# Supplementary material for: Facile, Scalable, Eco-Friendly Fabrication of High-Performance Flexible All-Solid-State Supercapacitors
Source: PubMed Central journal article supplement (PMC6401692; doi:10.3390/polym10111247), 2018-11-11
Supplement: polymers-10-01247-s001.pdf [file polymers-10-01247-s001.pdf]

## Supplementary Information

# Facile, scalable, eco-friendly fabrication of high-performance flexible all-solid-state supercapacitors

Jincy Parayangattil Jyothibasu <sup>1,2</sup> and Rong-Ho Lee <sup>2,\*</sup>

<sup>1</sup> Department of Environmental Engineering, National Chung Hsing University, Taichung 402, Taiwan ;  
jincycusat@gmail.com

<sup>2</sup> Department of Chemical Engineering, National Chung Hsing University, Taichung 402, Taiwan;  
rhl@nchu.edu.tw

\* Correspondence: Rong-Ho Lee—e-mail: rhl@dragon.nchu.edu.tw; Tel.: +886-4-22854308

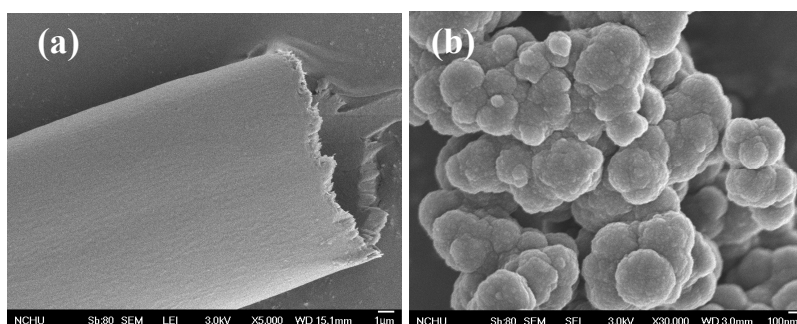

Fig. S1 SEM images of the (a) raw Kapok fiber and (b) PPy powder.

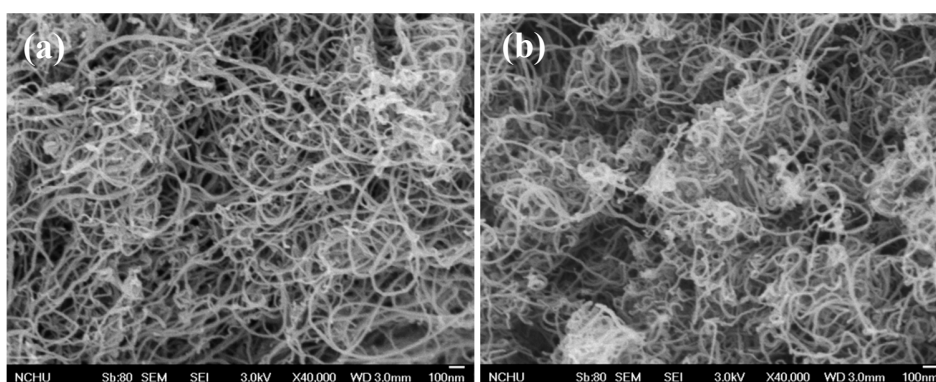

Fig. S2 SEM images of the (a) raw and (b) functionalized CNTs (*f*-CNTs).

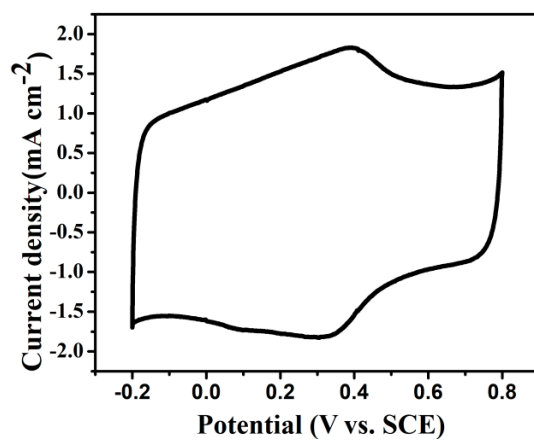

**Fig. S3** CV curve of the pure *f*-CNT freestanding electrode, measured at 5 mV s<sup>-1</sup>.

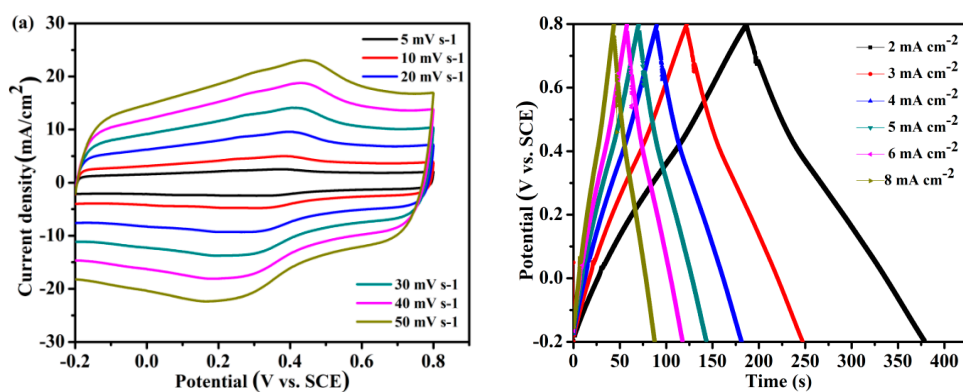

**Fig. S4** (a) CV curves recorded at various scan rates and (b) GCD curves recorded at various current densities of the pure *f*-CNT freestanding hybrid electrode.

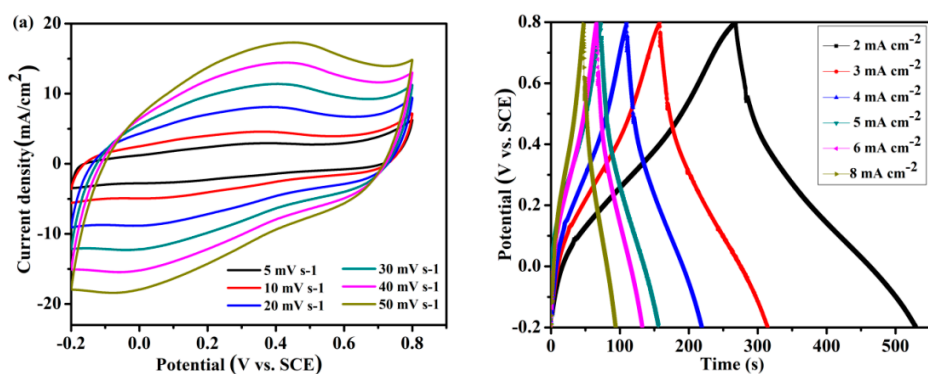

**Fig. S5** (a) CV curves recorded at various scan rates and (b) GCD curves recorded at various current densities for the KF@PPy/f-CNT12 freestanding hybrid electrode.

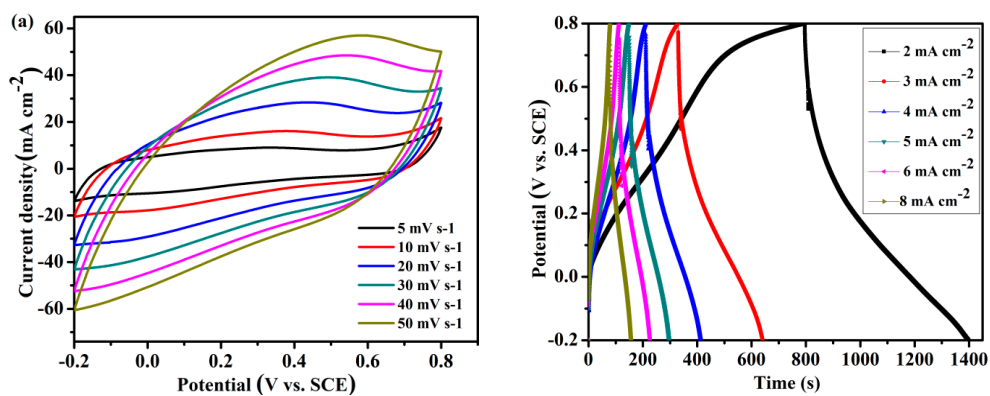

**Fig. S6** (a) CV curves recorded at various scan rates and (b) GCD curves recorded at various current densities for the KF@PPy/f-CNT21 freestanding hybrid electrode.

**TABLE S1** Capacitive performances of freestanding electrodes reported in the literature and in this present study

| Electrode materials                                                                             | Specific capacitance of electrode                                                                          | Electrolyte                            | Capacitance retention                | Ref.             |
|-------------------------------------------------------------------------------------------------|------------------------------------------------------------------------------------------------------------|----------------------------------------|--------------------------------------|------------------|
|                                                                                                 | 1289 mF cm <sup>-2</sup> (5 mV s <sup>-1</sup> )                                                           |                                        |                                      |                  |
| <b>KF@PPy/f-CNT11</b>                                                                           | <b>1138 mF cm<sup>-2</sup> (2 mA cm<sup>-2</sup>)</b><br><b>52 F cm<sup>-3</sup> (5 mV s<sup>-1</sup>)</b> | <b>1 M H<sub>2</sub>SO<sub>4</sub></b> | <b>86.5%</b><br><b>(1000 cycles)</b> | <b>This work</b> |
| rGO/PPy NT paper                                                                                | 807 mF cm <sup>-2</sup> (1 mA cm <sup>-2</sup> )                                                           | 1 M H <sub>2</sub> SO <sub>4</sub>     | 78.0%<br>(2000 cycles)               | 1                |
| GO-PPy paper                                                                                    | 440 mF cm <sup>-2</sup> (0.5 A g <sup>-1</sup> )                                                           | 1 M H <sub>2</sub> SO <sub>4</sub>     | 81%                                  | 2                |
| rGO/PPy paper                                                                                   | 468 mF cm <sup>-2</sup> (1 mA cm <sup>-2</sup> )                                                           | 1 M H <sub>2</sub> SO <sub>4</sub>     | –                                    | 3                |
| PPy/MnO <sub>2</sub> composite                                                                  | 240 mF cm <sup>-2</sup> (5 mV s <sup>-1</sup> )                                                            | 1.0 M Na <sub>2</sub> SO <sub>4</sub>  | 62.3%                                | 4                |
| ICNT-GO/PPy                                                                                     | 202.3 mF cm <sup>-2</sup> (10 mV s <sup>-1</sup> )                                                         | 1.0 M KCl                              | –                                    | 5                |
| PPy/l-Ti <sub>3</sub> C <sub>2</sub> film (l-Ti <sub>3</sub> C <sub>2</sub> , a MXene material) | 203 mF cm <sup>-2</sup>                                                                                    | 0.5 M H <sub>2</sub> SO <sub>4</sub>   | 100%<br>(20,000 cycles)              | 6                |
| CNT/PANI hydrogel film                                                                          | 680 mF cm <sup>-2</sup> (1 mA cm <sup>-2</sup> )                                                           | 1 M H <sub>2</sub> SO <sub>4</sub>     | –                                    | 7                |
| CNT/PPy electrode                                                                               | 0.28 F cm <sup>-2</sup> (1.4 mA cm <sup>-2</sup> )                                                         | 0.05 M Na <sub>2</sub> SO <sub>4</sub> | –                                    | 8                |
| RGO/PPy CCFs paper                                                                              | 363 mF cm <sup>-2</sup> (0.5 mA cm <sup>-2</sup> )                                                         | PVA/H <sub>3</sub> PO <sub>4</sub>     | –                                    | 9                |
| Reduced graphene oxide/polypyrrole/cellulose hybrid papers                                      | 1.20 F cm <sup>-2</sup> (2 mA cm <sup>-2</sup> )                                                           | 1 M NaCl                               | 89.5%<br>(5000 cycles)               | 10               |
| rGO/PPy films                                                                                   | 411 mF cm <sup>-2</sup> (0.2 mA cm <sup>-2</sup> )                                                         | 1 M KCl                                | 80%<br>(5000 cycles)                 | 11               |
| Graphite/polyaniline hybrid electrodes on printing paper                                        | 355.6 mF cm <sup>-2</sup> (0.5 mA cm <sup>-2</sup> )                                                       | 1 M H <sub>2</sub> SO <sub>4</sub>     | –                                    | 12               |
| PPy-coated cotton fabrics                                                                       | 1325 mF cm <sup>-2</sup> at 2 mA cm <sup>-2</sup>                                                          | 1 M Na <sub>2</sub> SO <sub>4</sub>    | 87% capacitance                      | 19               |

|                                                                                      |                                                  |                                    |                                                                                                               |    |
|--------------------------------------------------------------------------------------|--------------------------------------------------|------------------------------------|---------------------------------------------------------------------------------------------------------------|----|
| Polypyrrole/reduced<br>graphene oxide coated<br>fabric electrodes<br>(Py-RGO-fabric) | 265 F g <sup>-1</sup> (5 mV s <sup>-1</sup> )    | 2.0 M NaCl                         | retention after<br>1000<br>charge/discharge<br>cycles<br><br>64% capacitance<br>retention after 500<br>cycles | 20 |
| PANI/Au/paper electrode                                                              | 800 mF cm <sup>-2</sup> (1 mA cm <sup>-2</sup> ) | 1 M H <sub>2</sub> SO <sub>4</sub> | -                                                                                                             | 21 |

**TABLE S2** Capacitive performances of all-solid-state supercapacitors reported in the literature and in this study

| Electrode material                                       | Specific capacitance of supercapacitor                                                                                                                     | Energy density                                                  | Power density                                           | Ref.             |
|----------------------------------------------------------|------------------------------------------------------------------------------------------------------------------------------------------------------------|-----------------------------------------------------------------|---------------------------------------------------------|------------------|
| <b>KF@PPy/f-CNT11</b>                                    | <b>258 mF cm<sup>-2</sup> (5 mV s<sup>-1</sup>)<br/>219.4 mF cm<sup>-2</sup> (0.5 mA cm<sup>-2</sup>)<br/>3.44 F cm<sup>-3</sup> (5 mV s<sup>-1</sup>)</b> | <b>22.3 μW h cm<sup>-2</sup><br/>297.3 μW h cm<sup>-3</sup></b> | <b>2.1 mW cm<sup>-2</sup><br/>28 mW cm<sup>-3</sup></b> | <b>This work</b> |
| ICNT-GO/PPy                                              | 70.0 mF cm <sup>-2</sup> (10 mV s <sup>-1</sup> )                                                                                                          | 6.3 μW h cm <sup>-2</sup>                                       | 3.7 mW cm <sup>-2</sup>                                 | 5                |
| CNT/PANI hydrogel film                                   | 184.6 F cm <sup>-2</sup> (1 mA cm <sup>-2</sup> )                                                                                                          | –                                                               | –                                                       | 7                |
| RGO/PPy CCFs paper                                       | –                                                                                                                                                          | 0.28 mW h cm <sup>-3</sup>                                      | 20.9 mW cm <sup>-3</sup>                                | 9                |
| rGO/PPy films                                            | 222 mF cm <sup>-2</sup>                                                                                                                                    | 20 μW h cm <sup>-2</sup>                                        | 5 mW cm <sup>-2</sup>                                   | 11               |
| Graphite/polyaniline hybrid electrodes on printing paper | 77.8 mF cm <sup>-2</sup> (0.1 mA cm <sup>-2</sup> )                                                                                                        | 0.32 mW h cm <sup>-3</sup>                                      | 0.054 W cm <sup>-3</sup>                                | 12               |
| CNT/PPy                                                  | 4.9 F cm <sup>-3</sup>                                                                                                                                     | 0.26 mW h cm <sup>-3</sup>                                      | 0.15 W cm <sup>-3</sup>                                 | 8                |
| PPy/CNT/cotton fabric                                    | 50.9 mF cm <sup>-2</sup> (10 mV s <sup>-1</sup> )                                                                                                          | 64.64 W h kg <sup>-1</sup>                                      | 5.14 kW kg <sup>-1</sup>                                | 13               |
| 3D-graphene/graphite-paper                               | 11 mF cm <sup>-2</sup>                                                                                                                                     | 1.24 μW h cm <sup>-2</sup>                                      | 1 mW cm <sup>-2</sup>                                   | 14               |
| PEDOT-GO/U-C electrode                                   | 30 mF cm <sup>-2</sup> (10 mV s <sup>-1</sup> )                                                                                                            | 0.0022 mW h cm <sup>-2</sup>                                    | 0.2 mW cm <sup>-2</sup>                                 | 15               |
| PANI-ZIF-67-CC                                           | 35 mF cm <sup>-2</sup>                                                                                                                                     | 0.0161 mW h cm <sup>-3</sup>                                    | 0.833 W cm <sup>-3</sup>                                | 16               |
| PEDOT/H-15G-CNTF                                         | 37.8 mF cm <sup>-2</sup> (5 mV s <sup>-1</sup> )                                                                                                           | 0.051 mW h cm <sup>-3</sup>                                     | 2.1 mW cm <sup>-3</sup>                                 | 17               |
| MoS <sub>2</sub> @CNT/RGO electrode                      | 29.7 mF cm <sup>-2</sup> (0.1 mA cm <sup>-2</sup> )                                                                                                        | 4.13 μW h cm <sup>-2</sup>                                      | 3.2 mW cm <sup>-2</sup>                                 | 18               |

## References

1. C. Yang, L. Zhang, N. Hu, Z. Yang, H. Wei and Y. Zhang, *Journal of Power Sources*, 2016, **302**, 39–45.
2. K. Shu, C. Wang, C. Zhao, Y. Ge and G. G. Wallace, *Electrochimica Acta*, 2016, **212**, 561–571.
3. C. Yang, L. Zhang, N. Hu, Z. Yang, H. Wei, Y. Wang and Y. Zhang, *Applied Surface Science*, 2016, **387**, 666–673.
4. X. Fan, X. Wang, G. Li, A. Yu and Z. Chen, *Journal of Power Sources*, 2016, **326**, 357–364.
5. H. Zhou and H. J. Zhai, *Organic Electronics*, 2016, **37**, 197–206.
6. M. Zhu, Y. Huang, Q. Deng, J. Zhou, Z. Pei, Q. Xue, Y. Huang, Z. Wang, H. Li, Q. Huang and C. Zhi, *Advanced Energy Materials*, 2016, **6**, 1600969.
7. S. Zeng, H. Chen, F. Cai, Y. Kang, M. Chen and Q. Li, *Journal of Materials Chemistry A*, 2015, **3**, 23864–23870.
8. Y. Chen, L. Du, P. Yang, P. Sun, X. Yu and W. Mai, *Journal of Power Sources*, 2015, **287**, 68–74.
9. S. Lyu, H. Chang, F. Fu, L. Hu, J. Huang and S. Wang, *Journal of Power Sources*, 2016, **327**, 438–446.
10. C. Wan, Y. Jiao and J. Li, *Journal of Materials Chemistry A*, 2017, **5**, 3819–3831.
11. J. Chen, Y. Wang, J. Cao, Y. Liu, Y. Zhou, J. H. Ouyang and D. Jia, *ACS Applied Materials & Interfaces*, 2017, **9**, 19831–19842.
12. B. Yao, L. Yuan, X. Xiao, J. Zhang, Y. Qi, J. Zhou, J. Zhou, B. Hu and W. Chen, *Nano Energy*, 2013, **2**, 1071–1078.
13. S. Huang, P. Chen, W. Lin, S. Lyu, G. Chen, X. Yin and W. Chen, *RSC Advances*, 2016, **6**, 13359–13364.
14. A. Ramadoss, K. Y. Yoon, M. J. Kwak, S. I. Kim, S. T. Ryu and J. H. Jang, *Journal of Power Sources*, 2017, **337**, 159–165.
15. D. Fu, H. Zhou, X.-M. Zhang, G. Han, Y. Chang and H. Li, *ChemistrySelect*, 2016, **1**, 285–289.
16. L. Wang, X. Feng, L. Ren, Q. Piao, J. Zhong, Y. Wang, H. Li, Y. Chen and B. Wang, *Journal of the American Chemical Society*, 2015, **137**, 4920–4923.
17. D. Fu, H. Li, X.-M. Zhang, G. Han, H. Zhou and Y. Chang, *Materials Chemistry and Physics*, 2016, **179**, 166–173.
18. S. Wang, J. Zhu, Y. Shao, W. Li, Y. Wu, L. Zhang and X. Hao, *Chemistry – A European Journal*, 2017, **23**, 3438–3446.

19. Y. Liang, W. Weng, J. Yang, L. Liu, Y. Zhang, L. Yang, X. Luo, Y. Cheng and M. Zhu, *RSC Advances*, 2017, **7**, 48934-48941.
20. J. Xu, D. Wang, Y. Yuan, W. Wei, L. Duan, L. Wang, H. Bao and W. Xu, *Organic Electronics*, 2015, **24**, 153-159.
21. L. Yuan, X. Xiao, T. Ding, J. Zhong, X. Zhang, Y. Shen, B. Hu, Y. Huang, J. Zhou and Z. L. Wang, *Angewandte Chemie International Edition*, 2012, **51**, 4934-4938.
